# Supplementary material
Source: HighWire-hosted journal article supplement (https://diabetes.diabetesjournals.org/content/suppl/2013/06/18/db12-1387)

SUPPLEMENTARY DATA

**Supplementary Table 1.** Distribution of DRB3\*02:02 and \*01:01 alleles on extended DRB1\*03:01 haplotypes among three groups (AFBAC, DR3/4, and DR3/3) Legend. The distribution of DRB3 \*01:01 and \*02:02 alleles on various extended DRB1\*03:01 haplotypes is shown in DR3/DR3 and DR3/DR4 genotypes as well as on AFBAC (control) DRB1\*03:01 haplotypes. The HLA-A,- C, -B, and DPB1 alleles that define the extended haplotypes were chosen on the basis of reported T1D associations. DRB1\*03:01 haplotypes bearing the DPB1\*01:01 allele, the B\*08:01 allele, C\*07:01, or the A\*01:01 allele are in very strong LD with DRB3:01:01 and so are not informative in the comparison of the distribution of the DRB3 alleles between these three groups. Similarly, DRB1\*03:01 haplotypes bearing DPB1\*02:02, B\*18:01, or the A\*30:02 allele are in very strong LD with DRB3:02:02 and, thus, are also not informative. The number of DRB1\*03:01 haplotypes bearing A\*24:02 and DPB1\*04:02 is small but the number of of DRB1\*03:01 haplotypes bearing DPB1\*03:01 allows a comparison of the distribution of DRB3 alleles among the three groups (Table 4).

|                  | <b>DRB3*02:02</b> |              |              | <b>DRB3:01:01</b> |              |              |
|------------------|-------------------|--------------|--------------|-------------------|--------------|--------------|
|                  | <b>AFBAC</b>      | <b>DR3/4</b> | <b>DR3/3</b> | <b>AFBAC</b>      | <b>DR3/4</b> | <b>DR3/3</b> |
| <b>DPB1*0101</b> | 0                 | 3            | 0            | 26                | 42           | 6            |
|                  | 0.00%             | 6.70%        | 0.00%        | 100%              | 93.30%       | 100%         |
| <b>DPB1*0202</b> | 2                 | 18           | 5            | 0                 | 0            | 0            |
|                  | 100%              | 100%         | 100%         | 0.00%             | 0.00%        | 0.00%        |
| <b>DPB1*0301</b> | 1                 | 7            | 8            | 3                 | 31           | 3            |
|                  | 25.00%            | 18.40%       | 72.70%       | 75.00%            | 81.60%       | 27.30%       |
| <b>DPB1*0402</b> | 1                 | 1            | 1            | 6                 | 3            | 1            |
|                  | 14.30%            | 25.00%       | 50.00%       | 85.70%            | 75.00%       | 50.00%       |
| <b>Cw *07:01</b> | 2                 | 5            | 2            | 54                | 117          | 23           |
|                  | 3.60%             | 4.10%        | 8.00%        | 96.40%            | 95.90%       | 92.00%       |
| <b>B*08:01</b>   | 2                 | 6            | 1            | 57                | 118          | 24           |
|                  | 3.40%             | 4.80%        | 4.00%        | 96.60%            | 95.20%       | 96.00%       |
| <b>B*18:01</b>   | 6                 | 35           | 13           | 1                 | 1            | 0            |
|                  | 85.70%            | 97.20%       | 100%         | 14.30%            | 2.80%        | 0.00%        |
| <b>A*01:01</b>   | 1                 | 5            | 1            | 43                | 80           | 17           |
|                  | 2.30%             | 5.90%        | 5.60%        | 97.70%            | 94.10%       | 94.40%       |
| <b>A*24:02</b>   | 2                 | 5            | 1            | 4                 | 10           | 3            |
|                  | 33.30%            | 33.30%       | 25.00%       | 66.70%            | 66.70%       | 75.00%       |
| <b>A*30:02</b>   | 3                 | 10           | 7            | 0                 | 0            | 0            |
|                  | 100%              | 100%         | 100.0%       | 0.00%             | 0.00%        | 0.00%        |

SUPPLEMENTARY DATA

**Supplementary Figure 1.** Structural model of the peptide binding groove of the DRB3\*02:02 molecule. Polymorphic amino acids encoded by DRB3\*02:02 but not by DRB3\*01:01 are shown.

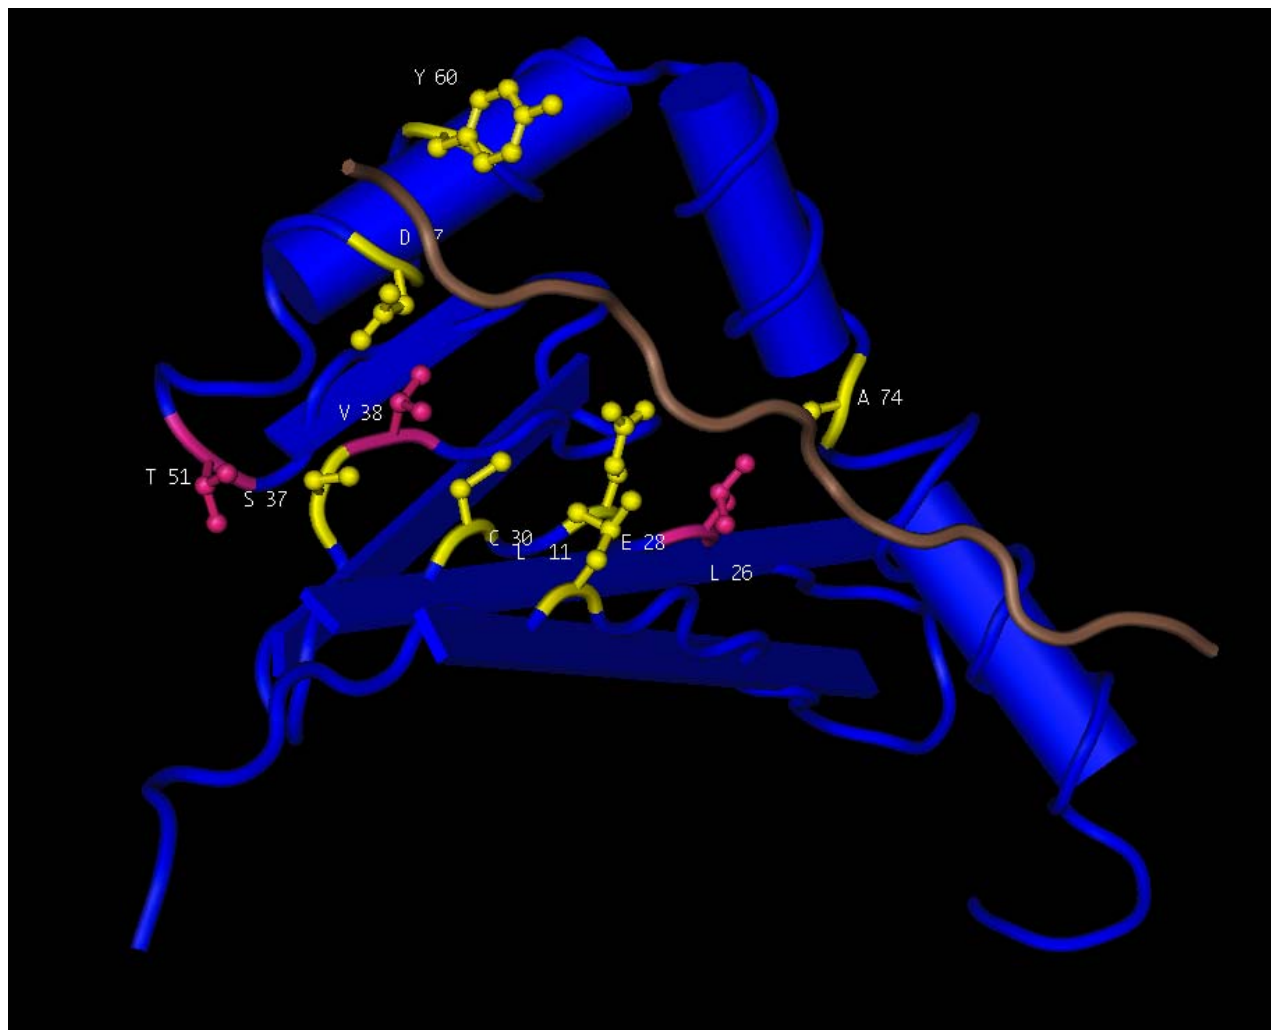

Supplement: DB121387SupplementaryData.pdf [file DB121387SupplementaryData.pdf]
